# Supplementary material for: Facial Feminization Surgery under Insurance: The University of California Los Angeles Experience
Source: PubMed Central journal article supplement — Plast Reconstr Surg Glob Open. 2021 May 18;9(5):e3572. doi: 10.1097/GOX.0000000000003572 (PMC8647877; doi:10.1097/gox.0000000000003572), 2021-05-18
Supplement: gox-9-e3572-s001.pdf [file gox-9-e3572-s001.pdf]

**Supplemental Digital Content 1.** Requested CPT codes and associated terminology for facial feminization surgery (16).

---

| <b>CPT Code</b> | <b>Terminology</b>                                                                                      | <b>Surgery</b>             |
|-----------------|---------------------------------------------------------------------------------------------------------|----------------------------|
| 15733           | Flaps (Skin and/or Deep Tissues) Procedures                                                             | Forehead                   |
| 15769           | Other Flaps and Grafts Procedures                                                                       | Lip                        |
| 15774           | Other Flaps and Grafts Procedures                                                                       | Multiple areas of the face |
| 21122           | Repair, Revision, and/or Reconstruction Procedures on the Head*                                         | Chin                       |
| 21139           | Repair, Revision, and/or Reconstruction Procedures on the Head*                                         | Forehead                   |
| 21175           | Repair, Revision, and/or Reconstruction Procedures on the Head*                                         | Forehead                   |
| 30420           | Repair Procedures on the Nose                                                                           | Nose                       |
| 31599           | Other Procedures on the Larynx                                                                          | Larynx                     |
| 67900           | Repair (Brow Ptosis, Blepharoptosis, Lid Retraction, Ectropion, Entropion)<br>Procedures on the Eyelids | Brow                       |

---

---
