# Supplementary material for: Facial Feminization Surgery under Insurance: The University of California Los Angeles Experience
Source: PubMed Central journal article supplement — Plast Reconstr Surg Glob Open. 2021 May 18;9(5):e3572. doi: 10.1097/GOX.0000000000003572 (PMC8647877; doi:10.1097/gox.0000000000003572), 2021-05-18
Supplement: gox-9-e3572-s002.pdf [file gox-9-e3572-s002.pdf]

**Supplemental Digital Content 2.** Total time and cost of the insurance approval process per group.

| Stage                     | Group A<br>(n = 22) |         |           |         | Group B<br>(n = 10) |         |            |          | Group C<br>(n = 4) |         |            |          |
|---------------------------|---------------------|---------|-----------|---------|---------------------|---------|------------|----------|--------------------|---------|------------|----------|
|                           | Time (h)            |         | Cost (\$) |         | Time (h)            |         | Cost (\$)  |          | Time (h)           |         | Cost (\$)  |          |
|                           | Total               | Average | Total     | Average | Total               | Average | Total      | Average  | Total              | Average | Total      | Average  |
| Submit for authorization* | 22.0                | 1.0     | \$616.00  | \$28.00 | 14.0                | 1.4     | \$392.00   | \$39.20  | 6.0                | 1.5     | \$168.00   | \$42.00  |
| Peer-to-peert†            | 0.0                 | 0.0     | \$0.00    | \$0.00  | 2.0                 | 1.0     | \$363.00   | \$36.30  | 0.0                | 0.0     | \$0.00     | \$0.00   |
| Appeal†                   | 0.0                 | 0.0     | \$0.00    | \$0.00  | 12.0                | 1.2     | \$2,178.00 | \$217.80 | 4.0                | 1.0     | \$726.00   | \$181.50 |
| Appeal*                   | 0.0                 | 0.0     | \$0.00    | \$0.00  | 12.0                | 1.2     | \$336.00   | \$33.60  | 4.0                | 1.0     | \$112.00   | \$28.00  |
| IMR†                      | 0.0                 | 0.0     | \$0.00    | \$0.00  | 11.0                | 1.1     | \$1,996.50 | \$199.65 | 5.0                | 1.3     | \$907.50   | \$226.88 |
| IMR*                      | 0.0                 | 0.0     | \$0.00    | \$0.00  | 11.0                | 1.1     | \$308.00   | \$30.80  | 5.0                | 1.3     | \$140.00   | \$35.00  |
| 2nd appeal†               | 0.0                 | 0.0     | \$0.00    | \$0.00  | 3.0                 | 1.0     | \$544.50   | \$54.45  | 4.0                | 1.0     | \$726.00   | \$181.50 |
| 2nd appeal*               | 0.0                 | 0.0     | \$0.00    | \$0.00  | 3.0                 | 1.0     | \$84.00    | \$8.40   | 4.0                | 1.0     | \$112.00   | \$28.00  |
| Additional phone calls†   | 0.0                 | 0.0     | \$0.00    | \$0.00  | 8.0                 | 1.3     | \$1,452.00 | \$145.20 | 4.0                | 1.3     | \$726.00   | \$181.50 |
| Additional phone calls*   | 8.0                 | 0.4     | \$224.00  | \$10.18 | 32.0                | 3.2     | \$896.00   | \$89.60  | 12.0               | 4.0     | \$336.00   | \$84.00  |
| Total*                    | 30.0                | 1.4     | \$840.00  | \$38.18 | 72.0                | 7.2     | \$2,016.00 | \$201.60 | 31.0               | 7.8     | \$868.00   | \$217.00 |
| Total†                    | 0.0                 | 0.0     | \$0.00    | \$0.00  | 36.0                | 3.6     | \$6,534.00 | \$653.40 | 17.0               | 4.3     | \$3,085.50 | \$771.38 |
| Total per patient         | 30.0                | 1.4     | \$840.00  | \$38.18 | 108.0               | 10.8    | \$8,550.00 | \$855.00 | 48.0               | 12.0    | \$3,953.50 | \$988.38 |

\*surgical coordinator task

†plastic surgeon task

Abbreviations: h, hours; IMR, independent medical review
